# Supplementary material
Source: PubMed Central journal article supplement (PMC3049228)
Supplement: supp_44_2_134__1.pdf [file supp_44_2_134__1.pdf]

## ONLINE DATA SUPPLEMENT

### IL1F9 STIMULATES CHEMOKINE PRODUCTION AND NEUTROPHIL INFLUX IN MOUSE LUNGS

**Ravisankar A Ramadas\***, **Susan L Ewart<sup>†</sup>**, **Benjamin D Medoff<sup>‡</sup>**, **Ann Marie LeVine\***

\*Department of Pediatrics, University of Florida, Gainesville, FL. <sup>†</sup>Department of Large Animal Clinical Sciences, Michigan State University, Lansing, MI. <sup>‡</sup> Pulmonary and Critical Care Unit, Center for Immunology and Inflammatory Diseases, Massachusetts General Hospital and Harvard Medical School, Charlestown, MA.

#### **Corresponding author:**

Ann Marie LeVine, MD

Pediatrics & Communicable Diseases

Pediatric Critical Care Medicine

University of Michigan Medical School

C.S. Mott Children's Hospital

Mott F-6882/Box 0243

1500 East Medical Center Drive

Ann Arbor, MI 48109

Telephone: (734) 764-5302

Fax: (734) 647-5624

E-mail address: [anlevine@med.umich.edu](mailto:anlevine@med.umich.edu)

**Running title:** IL1F9 is proinflammatory in lung diseases

**Keywords:** IL1F9, chemokines, lung diseases, inflammation, neutrophil

Table S1. Primers used in qRT-PCR mini-arrays.

| No | Gene | Primer name    | Primer sequence 5'-3' |
|----|------|----------------|-----------------------|
| 1  | CCL1 | SYBR PF - CCL1 | ACAGGAGGAGCCCATCTTTC  |
|    | CCL1 | SYBR PR - CCL1 | CTGCCGTGTGGATACAGGAT  |
| 2  | CCL2 | SYBR PF - CCL2 | TCTCCAGCCTACTCATTGGG  |
|    | CCL2 | SYBR PR - CCL2 | AGGTCCCTGTCATGCTTCTG  |
| 3  | CCL3 | SYBR PF - CCL3 | TAGGAGAAGCAGCAGGCAGT  |
|    | CCL3 | SYBR PR - CCL3 | CCTCTGTCACCTGCTCAACA  |
| 4  | CCL4 | SYBR PF - CCL4 | AGAAACAGCAGGAAGTGGGA  |
|    | CCL4 | SYBR PR - CCL4 | GCTCTGTGCAAACCTAACCC  |
| 5  | CCL5 | SYBR PF - CCL5 | CACTTCTTCTCTGGGTTGGC  |
|    | CCL5 | SYBR PR - CCL5 | CTGCTGCTTTGCCTACCTCT  |
| 6  | CCL6 | SYBR PF - CCL6 | TGGGATCTGTGTGGCATAAG  |
|    | CCL6 | SYBR PR - CCL6 | TTATCCTTGTGGCTGTCCTTG |
| 7  | CCL7 | SYBR PF - CCL7 | TCCTCTTGGGGATCTTTTGTT |
|    | CCL7 | SYBR PR - CCL7 | ACCATGAGGATCTCTGCCAC  |
| 8  | CCL8 | SYBR PF - CCL8 | CTCGTAGCTTTTCAGCACCC  |
|    | CCL8 | SYBR PR - CCL8 | TTCTTTGCCTGCTGCTCATA  |
| 9  | CCL9 | SYBR PF - CCL9 | TTGAAAGCCCATGTGAAACA  |

|    |       |                 |                      |
|----|-------|-----------------|----------------------|
|    | CCL9  | SYBR PR - CCL9  | ACTGCCCTCTCCTTCCTCAT |
| 10 | CCL11 | SYBR PF - CCL11 | CTATGGCTTTCAGGGTGCAT |
|    | CCL11 | SYBR PR - CCL11 | TCACTTCCTTCACCTCCCAG |
| 11 | CCL12 | SYBR PF - CCL12 | CCTGAAGATCACAGCTTCCC |
|    | CCL12 | SYBR PR - CCL12 | GTCCTCAGGTATTGGCTGGA |
| 12 | CCL17 | SYBR PF - CCL17 | ATCCCTGGAACACTCCACTG |
|    | CCL17 | SYBR PR - CCL17 | TGCTTCTGGGGACTTTTCTG |
| 13 | CCL19 | SYBR PF - CCL19 | CACAGACAGGCAGCAGTCTT |
|    | CCL19 | SYBR PR - CCL19 | CACTCACTCTCTGTGGCCTG |
| 14 | CCL20 | SYBR PF - CCL20 | GGAAGGAAGAGGCGTCTGTA |
|    | CCL20 | SYBR PR - CCL20 | ACTCCTGGAGCTGAGAATGG |
| 15 | CCL22 | SYBR PF - CCL22 | CAGGTCCTCCTCCCTAGGAC |
|    | CCL22 | SYBR PR - CCL22 | TCTGGACCTCAAATCCTGC  |
| 16 | CCL24 | SYBR PF - CCL24 | CTTATGGCCCTTCTTGGTGA |
|    | CCL24 | SYBR PR - CCL24 | CTGTGACCATCCCCTCATCT |
| 17 | CCL25 | SYBR PF - CCL25 | CTAGCATGCCGGAGAACATT |
|    | CCL25 | SYBR PR - CCL25 | GAAACTGTGGCTTTTTGCCT |
| 18 | CCL27 | SYBR PF - CCL27 | GGTTCTGGGGATGAACACAG |
|    | CCL27 | SYBR PR - CCL27 | ATAGACAGCCACTCCCAAGC |
| 19 | CCL28 | SYBR PF - CCL28 | AGACACCTCAGTGCAACAGC |
|    | CCL28 | SYBR PR - CCL28 | TCACCTGAGTCATTGCCAGA |
| 20 | CXCL1 | SYBR PF - CXCL1 | GTGCCATCAGAGCAGTCTGT |
|    | CXCL1 | SYBR PR - CXCL1 | GCACCCAAACCGAAGTCATA |
| 21 | CXCL2 | SYBR PF - CXCL2 | CATCAGGTACGATCCAGGCT |

|    |        |                  |                        |
|----|--------|------------------|------------------------|
|    | CXCL2  | SYBR PR - CXCL2  | CCTGGTTCAGAAAATCATCCA  |
| 22 | CXCL4  | SYBR PF - CXCL4  | GATCTCCATCGCTTTCTTCG   |
|    | CXCL4  | SYBR PR - CXCL4  | GGTCTTGACATGAGCGTCG    |
| 23 | CXCL5  | SYBR PF - CXCL5  | TGCATTCCGCTTAGCTTTCT   |
|    | CXCL5  | SYBR PR - CXCL5  | GCCCTACGGTGGAAGTCATA   |
| 24 | CXCL7  | SYBR PF - CXCL7  | GAATGGGATTCCAGAGATGG   |
|    | CXCL7  | SYBR PR - CXCL7  | CTGCCCACTTCATAACCTCC   |
| 25 | CXCL9  | SYBR PF - CXCL9  | TTTCCCCCTCTTTTGCTTTT   |
|    | CXCL9  | SYBR PR - CXCL9  | CCCAATTGCAACAAAACCTGA  |
| 26 | CXCL10 | SYBR PF - CXCL10 | CTTCCCTATGGCCCTCATTC   |
|    | CXCL10 | SYBR PR - CXCL10 | AAGTGCTGCCGTCATTTTCT   |
| 27 | CXCL11 | SYBR PF - CXCL11 | GCTTTCTCGATCTCTGCCAT   |
|    | CXCL11 | SYBR PR - CXCL11 | AACAGGAAGGTCACAGCCAT   |
| 28 | CXCL12 | SYBR PF - CXCL12 | GGCGTCTGACTCACACCTCT   |
|    | CXCL12 | SYBR PR - CXCL12 | ACACTCCAAACTGTGCCCTT   |
| 29 | CXCL13 | SYBR PF - CXCL13 | CCGACAACAGTTGAAATCACTC |
|    | CXCL13 | SYBR PR - CXCL13 | CAGAATGAGGCTCAGCACAG   |
| 30 | CXCL14 | SYBR PF - CXCL14 | GATGAAGCGTTTGGTGCTCT   |
|    | CXCL14 | SYBR PR - CXCL14 | AAGCTGGAAATGAAGCCAAA   |
| 31 | CXCL15 | SYBR PF - CXCL15 | TCTCAGGTCTCCCAAATGAAA  |
|    | CXCL15 | SYBR PR - CXCL15 | CCATGGGTGAAGGCTACTGT   |
| 32 | CXCL16 | SYBR PF - CXCL16 | ACTGGCTTGAGGCAAATGTT   |
|    | CXCL16 | SYBR PR - CXCL16 | GGTTCCAGTTGCAGTCCAAA   |
| 33 | XCL1   | SYBR PF - XCL1   | CCCCTCCCAGATGATATAGGT  |

|    |        |                  |                         |
|----|--------|------------------|-------------------------|
|    | XCL1   | SYBR PR - XCL1   | TGACTTTCCTGGGAGTCTGC    |
| 34 | CX3CL1 | SYBR PF - CX3CL1 | ACTCCTGGTTTAGCTGATAGCG  |
|    | CX3CL1 | SYBR PR - CX3CL1 | CGCGTTCTTCCATTTGTGTA    |
| 35 | CCR1   | SYBR PF - CCR1   | GCTGAGGAACTGGTCAGGAA    |
|    | CCR1   | SYBR PR - CCR1   | AGGTTGGGACCTTGAACCTT    |
| 36 | CCR2   | SYBR PF - CCR2   | TCCTTTGATTTGTTTTGCAGAT  |
|    | CCR2   | SYBR PR - CCR2   | TGCCATCATAAAGGAGCCAT    |
| 37 | CCR3   | SYBR PF - CCR3   | CCCCAGCTCTTTGATTCTGA    |
|    | CCR3   | SYBR PR - CCR3   | AAAGGACTTAGCAAAATTCACCA |
| 38 | CCR4   | SYBR PF - CCR4   | GTTTCATCCTGGGTGGTGTC    |
|    | CCR4   | SYBR PR - CCR4   | CGGCATTGCTTCATAGACTG    |
| 39 | CCR5   | SYBR PF - CCR5   | AGCCGCAATTTGTTTCACAT    |
|    | CCR5   | SYBR PR - CCR5   | GAGACATCCGTTCCCCCTAC    |
| 40 | CCR6   | SYBR PF - CCR6   | CTGGAACTCTGCAGAACGCT    |
|    | CCR6   | SYBR PR - CCR6   | TGGCCAGTCTACTTTGGAGC    |
| 41 | CCR7   | SYBR PF - CCR7   | ACACAGGAAGGCTGTGCTTT    |
|    | CCR7   | SYBR PR - CCR7   | CATGGACTGCTATCTGCGTC    |
| 42 | CCR8   | SYBR PF - CCR8   | GAGGAGGAACTCTGCGTCAC    |
|    | CCR8   | SYBR PR - CCR8   | AAACCTCAGAAGAAAGGCTCG   |
| 43 | CCR9   | SYBR PF - CCR9   | CATCTGTGGAAGCAGTGGAG    |
|    | CCR9   | SYBR PR - CCR9   | ACTCACCTCCGCCGTACAT     |
| 44 | CXCR3  | SYBR PF - CXCR3  | CAGAAGAAAGGCAAAGTCCG    |
|    | CXCR3  | SYBR PR - CXCR3  | AAGTTCCCAACCACAAGTGC    |
| 45 | CXCR4  | SYBR PF - CXCR4  | CTCCAGACCCCACTTCTTCA    |

|    |       |                 |                         |
|----|-------|-----------------|-------------------------|
|    | CXCR4 | SYBR PR - CXCR4 | AGGTGCAGGTAGCAGTGACC    |
| 46 | CXCR5 | SYBR PF - CXCR5 | CGTTTGTTCCTCCTGGCTGTT   |
|    | CXCR5 | SYBR PR - CXCR5 | CTGGAACAAAGCTACTGGGC    |
| 47 | XCR1  | SYBR PF - XCR1  | AGATGGTGGAAAAGAAGATGACA |
|    | XCR1  | SYBR PR - XCR1  | GACTTGAAACCCTGACATGGA   |

Table S2. Fold change in mRNA expression following HDM or IL1F9 challenges.

| Gene         | Fold change in expression |         |         |       |
|--------------|---------------------------|---------|---------|-------|
|              | 1h                        | 48h     | 6h      | 24h   |
|              | HDM                       | HDM     | IL1F9   | IL1F9 |
| <b>CCL1</b>  | NS                        | NS      | 2.31    | NS    |
| <b>CCL2</b>  | 9.78                      | 54.42   | 227.54  | NS    |
| <b>CCL3</b>  | 24.00                     | NS      | 594.69  | NS    |
| <b>CCL4</b>  | 53.45                     | NS      | 1274.75 | NS    |
| <b>CCL5</b>  | 2.29                      | NS      | 6.62    | NS    |
| <b>CCL6</b>  | 2.34                      | 9.96    | 1.80    | 1.04  |
| <b>CCL7</b>  | 15.32                     | 73.01   | 132.51  | NS    |
| <b>CCL8</b>  | 28.25                     | 1406.60 | 14.10   | 30.32 |
| <b>CCL9</b>  | 15.71                     | NS      | 13.10   | NS    |
| <b>CCL11</b> | 6.36                      | 61.39   | 2.18    | NS    |
| <b>CCL12</b> | 27.05                     | 49.66   | 44.51   | 20.51 |
| <b>CCL17</b> | NS                        | 7.30    | 4.72    | NS    |
| <b>CCL19</b> | NS                        | -1.18   | 2.27    | NS    |

|               |       |        |        |       |
|---------------|-------|--------|--------|-------|
| <b>CCL20</b>  | NS    | NS     | 124.16 | NS    |
| <b>CCL22</b>  | -1.16 | 3.48   | 5.59   | NS    |
| <b>CCL24</b>  | 4.18  | 142.22 | NS     | -1.07 |
| <b>CCL25</b>  | 1.48  | 0.00   | 1.66   | NS    |
| <b>CCL27</b>  | 0.00  | 1.47   | -1.36  | -1.84 |
| <b>CXCL1</b>  | 12.15 | 43.90  | 15.69  | NS    |
| <b>CXCL2</b>  | 44.86 | NS     | 156.72 | NS    |
| <b>CXCL4</b>  | 1.23  | 2.91   | 3.07   | NS    |
| <b>CXCL5</b>  | NS    | 45.76  | 43.71  | NS    |
| <b>CXCL7</b>  | -1.02 | 1.48   | 1.04   | 1.12  |
| <b>CXCL9</b>  | 7.86  | NS     | 599.66 | 45.95 |
| <b>CXCL10</b> | NS    | NS     | 533.00 | NS    |
| <b>CXCL11</b> | NS    | NS     | 262.83 | NS    |
| <b>CXCL12</b> | 1.09  | 2.73   | 94.75  | 17.38 |
| <b>CXCL13</b> | NS    | 13.79  | 25.71  | 3.24  |
| <b>CXCL14</b> | -1.36 | -1.31  | 3.07   | NS    |
| <b>CXCL15</b> | 1.20  | 6.16   | 1.80   | 3.34  |
| <b>CXCL16</b> | 1.01  | 2.95   | 4.48   | 3.20  |
| <b>XCL1</b>   | NS    | NS     | 6.01   | 17.53 |
| <b>CCR1</b>   | 8.65  | NS     | 19.89  | NS    |
| <b>CCR2</b>   | 2.98  | NS     | 7.68   | NS    |
| <b>CCR5</b>   | NS    | 4.77   | 24.08  | NS    |
| <b>CCR6</b>   | NS    | NS     | -1.58  | NS    |
| <b>CCR8</b>   | NS    | NS     | NS     | -1.30 |

|              |      |    |      |      |
|--------------|------|----|------|------|
| <b>CCR9</b>  | NS   | NS | 2.87 | NS   |
| <b>CXCR3</b> | NS   | NS | NS   | 3.83 |
| <b>CXCR4</b> | 1.23 | NS | 2.60 | 1.94 |
| <b>CXCR5</b> | NS   | NS | 6.18 | 5.58 |
| <b>XCR1</b>  | NS   | NS | 1.15 | NS   |

**TABLE S2.** Overlapping as well as distinct lung chemokine and chemokine receptor expression patterns in lungs of mice challenged with HDM or IL1F9 compared to PBS controls. Lungs were collected 1 and 48 following the last HDM challenge or 6 and 24h following the last of four IL1F9 challenges, RNA isolated and qPCR mini-array analyses performed. Data reported include genes that are significantly upregulated ( $p < 0.05$ ) in HDM challenged mouse lungs compared to PBS challenged controls 1 and 48h following the last challenge. Data reported also include genes that are significantly upregulated ( $p < 0.05$ ) in IL1F9 challenged mouse lungs compared to PBS challenged controls 6h and 24h following the last of four intratracheal challenges. Data are presented as fold change in mRNA expression relative to 18S rRNA expression ( $n = 4-5$  mice/group/timepoint). NS = not significant.
